# Supplementary material for: Beliefs and practices among primary care physicians during the first wave of the COVID-19 pandemic in Baden-Wuerttemberg (Germany): an observational study
Source: BMC Fam Pract. 2021 May 6;22:86. doi: 10.1186/s12875-021-01433-9 (PMC8099434; doi:10.1186/s12875-021-01433-9)
Supplement: Supplementary file 1 — Additional file 1 [file 12875_2021_1433_MOESM1_ESM.pdf]

## Additional File 1

### Beliefs and practices among primary care physicians during the first wave of the COVID-19 pandemic in Baden-Wuerttemberg (Germany): an observational study

Catharina Roth<sup>1</sup>, Amanda Breckner<sup>1</sup>, Sophia Moellinger<sup>1</sup>, Simon Schwill<sup>1</sup>, Frank Peters-Klimm<sup>1</sup>, Joachim Szecsenyi<sup>1</sup>, Sandra Stengel<sup>1</sup>, Michel Wensing<sup>1</sup>

<sup>1</sup> Heidelberg University Hospital, Department of General Practice and Health Services Research, Marsilius Arcades, West Tower, Im Neuenheimer Feld 130.3, 69120 Heidelberg, Germany

|                                                        |                                                                                                                                                                                                                                                                   |
|--------------------------------------------------------|-------------------------------------------------------------------------------------------------------------------------------------------------------------------------------------------------------------------------------------------------------------------|
| Catharina Roth GKP. B.Sc. MPH*<br>Corresponding author | Department of General Practice and Health Services Research<br>Heidelberg University Hospital, Marsilius Arcades, West Tower, Im Neuenheimer Feld 130.3, D-69120 Heidelberg<br>Email: catharina.roth@med.uni-heidelberg.de                                        |
| Amanda Breckner M.A.*                                  | Department of General Practice and Health Services Research<br>Heidelberg University Hospital, Marsilius Arcades, West Tower, Im Neuenheimer Feld 130.3, D-69120 Heidelberg<br>Telefonnummer: +49 6221/ 56 34646<br>E-Mail: amanda.breckner@med.uni-heidelberg.de |
| Sophia Moellinger B.Sc.                                | Department of General Practice and Health Services Research<br>Heidelberg University Hospital, Marsilius Arcades, West Tower, Im Neuenheimer Feld 130.3, D-69120 Heidelberg<br>Email: Sophia.Moellinger@med.uni-heidelberg.de                                     |
| Dr. med. Simon Schwill                                 | Department of General Practice and Health Services Research<br>Heidelberg University Hospital, Marsilius Arcades, West Tower, Im Neuenheimer Feld 130.3, D-69120 Heidelberg<br>Email: simon.schwill@med.uni-heidelberg.de                                         |
| Prof. Dr. med. Frank Peters-Klimm                      | Department of General Practice and Health Services Research<br>Heidelberg University Hospital, Marsilius Arcades, West Tower, Im Neuenheimer Feld 130.3, D-69120 Heidelberg<br>Email: frank.peters-klimm@med.uni-heidelberg.de                                    |
| Prof. Dr. med. Joachim Szecsenyi. Dipl. Soz.           | Department of General Practice and Health Services Research<br>Heidelberg University Hospital, Marsilius Arcades, West Tower, Im Neuenheimer Feld 130.3, D-69120 Heidelberg<br>Email: joachim.szecsenyi@med.uni-heidelberg.de                                     |
| Dr. med. Sandra Stengel                                | Department of General Practice and Health Services Research<br>Heidelberg University Hospital, Marsilius Arcades, West Tower, Im Neuenheimer Feld 130.3, D-69120 Heidelberg<br>Email: sandra.stengel@med.uni-heidelberg.de                                        |
| Prof. Dr. Michel Wensing. M.Sc.                        | Department of General Practice and Health Services Research<br>Heidelberg University Hospital, Marsilius Arcades, West Tower, Im Neuenheimer Feld 130.3, D-69120 Heidelberg<br>Email: michel.wensing@med.uni-heidelberg.de                                        |

\* These authors contributed equally

## Questionnaire: Primary Care Practice

### Part 1: Demographic and Practice Characteristics

|                                                                                                                                                                                                                                                                                                                                                                               |                                                                                                                                                                                                                                                                                               |
|-------------------------------------------------------------------------------------------------------------------------------------------------------------------------------------------------------------------------------------------------------------------------------------------------------------------------------------------------------------------------------|-----------------------------------------------------------------------------------------------------------------------------------------------------------------------------------------------------------------------------------------------------------------------------------------------|
| <b>Bitte geben Sie das heutige Datum an.</b><br>z.B. 12.03.2020                                                                                                                                                                                                                                                                                                               |                                                                                                                                                                                                                                                                                               |
| <b>Soziodemographie</b>                                                                                                                                                                                                                                                                                                                                                       |                                                                                                                                                                                                                                                                                               |
| <b>Welcher Altersgruppe gehören Sie an?</b>                                                                                                                                                                                                                                                                                                                                   | <input type="checkbox"/> < 30 Jahre<br><input type="checkbox"/> 30 bis 40 Jahre<br><input type="checkbox"/> 41 bis 50 Jahre<br><input type="checkbox"/> 51 bis 60 Jahre<br><input type="checkbox"/> 61 bis 70 Jahre<br><input type="checkbox"/> > 70 Jahre                                    |
| <b>Welchem Geschlecht fühlen Sie sich zugehörig?</b>                                                                                                                                                                                                                                                                                                                          | <input type="checkbox"/> Weiblich<br><input type="checkbox"/> Männlich<br><input type="checkbox"/> Divers<br><input type="checkbox"/> Andere: _____                                                                                                                                           |
| <b>Struktur/Organisation</b>                                                                                                                                                                                                                                                                                                                                                  |                                                                                                                                                                                                                                                                                               |
| <b>Wie viele Einwohner hat der Ort, in dem sich Ihre Einrichtung befindet?</b>                                                                                                                                                                                                                                                                                                | <input type="checkbox"/> < 5000 Einwohner*innen<br><input type="checkbox"/> 5000 - < 20.000 Einwohner*innen<br><input type="checkbox"/> 20.000 - < 100.000 Einwohner*innen<br><input type="checkbox"/> 100.000 und mehr Einwohner*innen<br><input type="checkbox"/> Kann ich nicht beurteilen |
| <b>Wo liegt Ihre Hausarztpraxis?</b>                                                                                                                                                                                                                                                                                                                                          | <input type="checkbox"/> Stadtzentrum<br><input type="checkbox"/> Stadt-Umkreis (20km)<br><input type="checkbox"/> Ländliches Gebiet (Stadt > 20km)                                                                                                                                           |
| <b>Welche berufliche Qualifikation haben Sie?</b><br><i>(Mehrfachnennung möglich)</i>                                                                                                                                                                                                                                                                                         | <input type="checkbox"/> Fachärztin/-arzt für Allgemeinmedizin<br><input type="checkbox"/> Fachärztin/-arzt für Innere Medizin<br><input type="checkbox"/> Sonstiges: _____                                                                                                                   |
| <b>Ich bin auch in einer Corona-Anlaufstelle (Abstrichstelle, Corona-Schwerpunktpraxis, zentrale Fieberambulanz) tätig oder tätig gewesen.</b>                                                                                                                                                                                                                                | <input type="checkbox"/> Ja<br><br><input type="checkbox"/> Nein                                                                                                                                                                                                                              |
| <p><b>Falls ja – bitte füllen Sie den Fragebogen nicht weiter aus und informieren Sie uns per Mail (Kontaktdaten siehe letzte Seite), dass Sie nicht an der Studie teilnehmen können. Hintergrund ist, dass es zu Verzerrungen kommen könnte, wenn Sie parallel zu Ihrer hausärztlichen Tätigkeit in einer Corona-Anlaufstelle tätig sind.</b></p> <p><b>Vielen Dank!</b></p> |                                                                                                                                                                                                                                                                                               |

## Part 2: Fear for a potential infection with SARS-CoV-2 or financial loss due to practice closure

| Einstellung/ Haltung                                                                                                                                                |                                                                                                                                                                                                                                                                                                                      |
|---------------------------------------------------------------------------------------------------------------------------------------------------------------------|----------------------------------------------------------------------------------------------------------------------------------------------------------------------------------------------------------------------------------------------------------------------------------------------------------------------|
| Ich habe Angst, mich bei meiner Tätigkeit mit SARS-CoV-2 anzustecken, weil ich <u>selbst erkranken</u> könnte.                                                      | <input type="checkbox"/> Trifft ganz zu<br><input type="checkbox"/> Trifft weitgehend zu<br><input type="checkbox"/> Trifft teils zu, teils nicht<br><input type="checkbox"/> Trifft weitgehend nicht zu<br><input type="checkbox"/> Trifft überhaupt nicht zu<br><input type="checkbox"/> Kann ich nicht beurteilen |
| Ich habe Angst, mich bei meiner Tätigkeit mit SARS-CoV-2 anzustecken, weil ich andere im <u>privaten</u> Umfeld anstecken könnte.                                   | <input type="checkbox"/> Trifft ganz zu<br><input type="checkbox"/> Trifft weitgehend zu<br><input type="checkbox"/> Trifft teils zu, teils nicht<br><input type="checkbox"/> Trifft weitgehend nicht zu<br><input type="checkbox"/> Trifft überhaupt nicht zu<br><input type="checkbox"/> Kann ich nicht beurteilen |
| Ich habe Angst, mich bei meiner Tätigkeit mit SARS-CoV-2 anzustecken, weil ich andere im <u>beruflichen</u> Umfeld (Patient*innen, Mitarbeitende) anstecken könnte. | <input type="checkbox"/> Trifft ganz zu<br><input type="checkbox"/> Trifft weitgehend zu<br><input type="checkbox"/> Trifft teils zu, teils nicht<br><input type="checkbox"/> Trifft weitgehend nicht zu<br><input type="checkbox"/> Trifft überhaupt nicht zu<br><input type="checkbox"/> Kann ich nicht beurteilen |
| Ich fürchte finanzielle Einbußen durch vorübergehende Schließung meiner Praxis im Falle einer Infektion durch SARS-CoV-2.                                           | <input type="checkbox"/> Ja<br><input type="checkbox"/> Nein                                                                                                                                                                                                                                                         |

**Part 3: Knowledge and sources of knowledge related to the SARS-CoV-2 pandemic**

| Wissensquellen/ Wissensstand                                                                                                              |                                                                                                                                                                                                                                                                                                                                                                                                                                                                                                                                                                                                                                                                                                                                                                                                                                                                                    |
|-------------------------------------------------------------------------------------------------------------------------------------------|------------------------------------------------------------------------------------------------------------------------------------------------------------------------------------------------------------------------------------------------------------------------------------------------------------------------------------------------------------------------------------------------------------------------------------------------------------------------------------------------------------------------------------------------------------------------------------------------------------------------------------------------------------------------------------------------------------------------------------------------------------------------------------------------------------------------------------------------------------------------------------|
| Bezüglich SARS-CoV-2 bin ich derzeit auf dem aktuellen <u>Wissensstand</u> .                                                              | <input type="checkbox"/> Trifft ganz zu<br><input type="checkbox"/> Trifft weitgehend zu<br><input type="checkbox"/> Trifft teils zu, teils nicht<br><input type="checkbox"/> Trifft weitgehend nicht zu<br><input type="checkbox"/> Trifft überhaupt nicht zu<br><input type="checkbox"/> Kann ich nicht beurteilen                                                                                                                                                                                                                                                                                                                                                                                                                                                                                                                                                               |
| Den Aufwand, eigene Wissenslücken bzgl. SARS-CoV-2 zu schließen, habe ich <u>zu Beginn der SARS-CoV-2-Pandemie</u> als hoch eingeschätzt. | <input type="checkbox"/> Trifft ganz zu<br><input type="checkbox"/> Trifft weitgehend zu<br><input type="checkbox"/> Trifft teils zu, teils nicht<br><input type="checkbox"/> Trifft weitgehend nicht zu<br><input type="checkbox"/> Trifft überhaupt nicht zu<br><input type="checkbox"/> Kann ich nicht beurteilen                                                                                                                                                                                                                                                                                                                                                                                                                                                                                                                                                               |
| Den Aufwand, eigene Wissenslücken bzgl. SARS-CoV-2 zu schließen, schätze ich <u>derzeit</u> als hoch ein.                                 | <input type="checkbox"/> Trifft ganz zu<br><input type="checkbox"/> Trifft weitgehend zu<br><input type="checkbox"/> Trifft teils zu, teils nicht<br><input type="checkbox"/> Trifft weitgehend nicht zu<br><input type="checkbox"/> Trifft überhaupt nicht zu<br><input type="checkbox"/> Kann ich nicht beurteilen                                                                                                                                                                                                                                                                                                                                                                                                                                                                                                                                                               |
| <u>Informationen</u> , die ich hierfür nutze, sind:                                                                                       | <input type="checkbox"/> Kassenärztliche Vereinigung<br><input type="checkbox"/> Robert-Koch-Institut (RKI)<br><input type="checkbox"/> Gesundheitsamt<br><input type="checkbox"/> Deutsche Gesellschaft für Allgemeinmedizin (DEGAM)<br><input type="checkbox"/> Hausärzteverband (HÄV)<br><input type="checkbox"/> Kolleg*innen<br><input type="checkbox"/> Ärztekammer<br><input type="checkbox"/> Deutsches Ärzteblatt<br><input type="checkbox"/> Deximed<br><input type="checkbox"/> Podcasts <ul style="list-style-type: none"> <li><input type="checkbox"/> NDR Prof. Drosten</li> <li><input type="checkbox"/> MDR Prof. Kekulé</li> <li><input type="checkbox"/> Ärztezeitung Prof. Scherer</li> <li><input type="checkbox"/> Sonstige</li> </ul> <input type="checkbox"/> Medizinische Journals<br><input type="checkbox"/> Sonstige: _____<br><input type="checkbox"/> |

## Part 4: Self-efficacy regarding anamnestic and diagnostic procedures related to SARS-CoV-2

| Anamnese und Diagnostik                                                                                                                                                                                                              |                                                                                                                                                                                                                                                                                                                      |
|--------------------------------------------------------------------------------------------------------------------------------------------------------------------------------------------------------------------------------------|----------------------------------------------------------------------------------------------------------------------------------------------------------------------------------------------------------------------------------------------------------------------------------------------------------------------|
| <b><u>Zu Beginn der SARS-CoV-2-Pandemie</u> habe ich mich in der Anamnese und Diagnostik bei PAT_COV sicher gefühlt.</b>                                                                                                             | <input type="checkbox"/> Trifft ganz zu<br><input type="checkbox"/> Trifft weitgehend zu<br><input type="checkbox"/> Trifft teils zu, teils nicht<br><input type="checkbox"/> Trifft weitgehend nicht zu<br><input type="checkbox"/> Trifft überhaupt nicht zu<br><input type="checkbox"/> Kann ich nicht beurteilen |
| <b><u>In der Osterzeit 2020</u> habe ich mich in der Anamnese und Diagnostik bei PAT_COV sicher gefühlt.</b>                                                                                                                         | <input type="checkbox"/> Trifft ganz zu<br><input type="checkbox"/> Trifft weitgehend zu<br><input type="checkbox"/> Trifft teils zu, teils nicht<br><input type="checkbox"/> Trifft weitgehend nicht zu<br><input type="checkbox"/> Trifft überhaupt nicht zu<br><input type="checkbox"/> Kann ich nicht beurteilen |
| <b><u>Derzeit</u> fühle ich mich in der Anamnese und Diagnostik bei PAT_COV sicher.</b>                                                                                                                                              | <input type="checkbox"/> Trifft ganz zu<br><input type="checkbox"/> Trifft weitgehend zu<br><input type="checkbox"/> Trifft teils zu, teils nicht<br><input type="checkbox"/> Trifft weitgehend nicht zu<br><input type="checkbox"/> Trifft überhaupt nicht zu<br><input type="checkbox"/> Kann ich nicht beurteilen |
| <b><u>Zu Beginn der SARS-CoV-2-Pandemie</u> habe ich mich in der Entscheidung des Procedere bei PAT_COV sicher gefühlt.</b><br><br><i>Procedere: Therapie, ambulante oder stationäre Weiterbehandlung, nächste Wiedervorstellung</i> | <input type="checkbox"/> Trifft ganz zu<br><input type="checkbox"/> Trifft weitgehend zu<br><input type="checkbox"/> Trifft teils zu, teils nicht<br><input type="checkbox"/> Trifft weitgehend nicht zu<br><input type="checkbox"/> Trifft überhaupt nicht zu<br><input type="checkbox"/> Kann ich nicht beurteilen |
| <b><u>In der Osterzeit 2020</u> fühlte ich mich in der Entscheidung des Procedere bei PAT_COV sicher.</b><br><br><i>Procedere: Therapie, ambulante oder stationäre Weiterbehandlung, nächste Wiedervorstellung</i>                   | <input type="checkbox"/> Trifft ganz zu<br><input type="checkbox"/> Trifft weitgehend zu<br><input type="checkbox"/> Trifft teils zu, teils nicht<br><input type="checkbox"/> Trifft weitgehend nicht zu<br><input type="checkbox"/> Trifft überhaupt nicht zu<br><input type="checkbox"/> Kann ich nicht beurteilen |
| <b><u>Derzeit</u> fühle ich mich in der Entscheidung des Procedere bei PAT_COV sicher.</b><br><br><i>Procedere: Therapie, ambulante oder stationäre Weiterbehandlung, nächste Wiedervorstellung</i>                                  | <input type="checkbox"/> Trifft ganz zu<br><input type="checkbox"/> Trifft weitgehend zu<br><input type="checkbox"/> Trifft teils zu, teils nicht<br><input type="checkbox"/> Trifft weitgehend nicht zu<br><input type="checkbox"/> Trifft überhaupt nicht zu<br><input type="checkbox"/> Kann ich nicht beurteilen |

## Part 5: Prevention measures to contain the spread of SARS-CoV-2

| Maßnahmen zur Eindämmung der SARS-CoV-2 Pandemie                                                               |                                                                                                                                                                                                                                                                                                                                              |
|----------------------------------------------------------------------------------------------------------------|----------------------------------------------------------------------------------------------------------------------------------------------------------------------------------------------------------------------------------------------------------------------------------------------------------------------------------------------|
| <b>Die Umsetzung der Hygienevorschriften bei Kontakt mit PAT_COV ist in unserer Einrichtung gut umsetzbar.</b> | <input type="checkbox"/> Trifft ganz zu<br><input type="checkbox"/> Trifft weitgehend zu<br><input type="checkbox"/> Trifft teils zu, teils nicht<br><input type="checkbox"/> Trifft weitgehend nicht zu<br><input type="checkbox"/> Trifft überhaupt nicht zu<br><input type="checkbox"/> Kann ich nicht beurteilen                         |
| <b>Die Distanzierung von PAT_COV gelingt in unserer Hausarztpraxis <u>räumlich</u>.</b>                        | <input type="checkbox"/> Trifft ganz zu<br><input type="checkbox"/> Trifft weitgehend zu<br><input type="checkbox"/> Trifft teils zu, teils nicht<br><input type="checkbox"/> Trifft weitgehend nicht zu<br><input type="checkbox"/> Trifft überhaupt nicht zu<br><input type="checkbox"/> Kann ich nicht beurteilen                         |
| <b>Wie führen Sie die räumliche Trennung genau durch?</b><br><br><i>(Mehrfachnennung möglich)</i>              | <input type="checkbox"/> Unterschiedliche Wartezimmer<br><input type="checkbox"/> Unterschiedliche Behandlungsräume<br><input type="checkbox"/> Wartezeit im eigenen Auto<br><input type="checkbox"/> Wartezeit vor der Einrichtung<br><input type="checkbox"/> Wegemarkierungen<br><input type="checkbox"/> Sonstige: _____<br>Anmerkungen: |
| <b>Die Distanzierung von PAT_COV gelingt in unserer Hausarztpraxis <u>zeitlich</u>.</b>                        | <input type="checkbox"/> Trifft ganz zu<br><input type="checkbox"/> Trifft weitgehend zu<br><input type="checkbox"/> Trifft teils zu, teils nicht<br><input type="checkbox"/> Trifft weitgehend nicht zu<br><input type="checkbox"/> Trifft überhaupt nicht zu<br><input type="checkbox"/> Kann ich nicht beurteilen                         |
| <b>Wie führen Sie die zeitliche Trennung genau durch?</b><br><br><i>(Mehrfachnennung möglich)</i>              | <input type="checkbox"/> Bestimmte Sprechstundenzeiten für PAT_COV<br><input type="checkbox"/> Weniger Patient*innen insgesamt<br><input type="checkbox"/> Bestimmte Wochentage ausschließlich für PAT_COV<br><input type="checkbox"/> Sonstige: _____<br>Anmerkungen:                                                                       |

**Part 6: Treatment capacity per SARS-CoV-2 contact point and primary care practices during the first wave of the SARS-CoV-2 pandemic in Baden-Wuerttemberg, Germany**

|                                                                                                                                                      |  |
|------------------------------------------------------------------------------------------------------------------------------------------------------|--|
| <b>Versorgung von Patient*innen <u>mit</u> Verdacht auf oder gesicherte COVID-19-Erkrankung (PAT_COV)</b>                                            |  |
| <b>Wie viele PAT_COV pro Tag haben Sie <u>seit März 2020</u> behandelt?</b><br><i>(es zählt auch eine alleinige Abstrichentnahme als Behandlung)</i> |  |
| <b>Durchschnittlich Tag</b>                                                                                                                          |  |
| <b>Gesamt seit Beginn der SARS-Cov-2-Pandemie 2020 im März 2020</b>                                                                                  |  |

## Questionnaire: Corona-Subspecialised Primary Care Practices

### Part 1: Demographic and Practice Characteristics

|                                                                                                                                                                                                                                       |                                                                                                                                                                                                                                                                                               |
|---------------------------------------------------------------------------------------------------------------------------------------------------------------------------------------------------------------------------------------|-----------------------------------------------------------------------------------------------------------------------------------------------------------------------------------------------------------------------------------------------------------------------------------------------|
| <b>Bitte geben Sie das heutige Datum an.</b><br>z.B. 12.03.2020                                                                                                                                                                       |                                                                                                                                                                                                                                                                                               |
| <b>Soziodemographie</b>                                                                                                                                                                                                               |                                                                                                                                                                                                                                                                                               |
| <b>Welcher Altersgruppe gehören Sie an?</b>                                                                                                                                                                                           | <input type="checkbox"/> < 30 Jahre<br><input type="checkbox"/> 30 bis 40 Jahre<br><input type="checkbox"/> 41 bis 50 Jahre<br><input type="checkbox"/> 51 bis 60 Jahre<br><input type="checkbox"/> 61 bis 70 Jahre<br><input type="checkbox"/> > 70 Jahre                                    |
| <b>Welchem Geschlecht fühlen Sie sich zugehörig?</b>                                                                                                                                                                                  | <input type="checkbox"/> Weiblich<br><input type="checkbox"/> Männlich<br><input type="checkbox"/> Divers<br><input type="checkbox"/> Andere: _____                                                                                                                                           |
| <b>Struktur/Organisation</b>                                                                                                                                                                                                          |                                                                                                                                                                                                                                                                                               |
| <b>In welcher Corona-Anlaufstelle sind Sie tätig?</b><br><i>Bitte berücksichtigen Sie in dieser Studie nur Ihre Tätigkeit in nebenstehender Einrichtung. Weitere Tätigkeitsfelder (z.B. Hausarztpraxen) werden gesondert befragt.</i> | <input type="checkbox"/> Zentrale Fieberambulanz<br><input type="checkbox"/> Corona-Schwerpunktpraxis<br><input type="checkbox"/> Abstrichstelle                                                                                                                                              |
| <b>Wie viele Einwohner*innen hat der Ort, in dem sich Ihre Corona-Anlaufstelle befindet?</b>                                                                                                                                          | <input type="checkbox"/> < 5000 Einwohner*innen<br><input type="checkbox"/> 5000 - < 20.000 Einwohner*innen<br><input type="checkbox"/> 20.000 - < 100.000 Einwohner*innen<br><input type="checkbox"/> 100.000 und mehr Einwohner*innen<br><input type="checkbox"/> Kann ich nicht beurteilen |
| <b>Wie groß ist der Radius des hauptsächlichen Einzugsgebiets Ihrer Corona-Anlaufstelle?</b>                                                                                                                                          | <input type="checkbox"/> < 15 km<br><input type="checkbox"/> 15 - < 30 km<br><input type="checkbox"/> 30 - < 50 km<br><input type="checkbox"/> 50 km oder mehr<br><input type="checkbox"/> Kann ich nicht beurteilen                                                                          |
| <b>Wo liegt Ihre Corona-Anlaufstelle?</b>                                                                                                                                                                                             | <input type="checkbox"/> Stadtzentrum<br><input type="checkbox"/> Stadt-Umkreis (20km)<br><input type="checkbox"/> Ländliches Gebiet (Stadt > 20km)                                                                                                                                           |
| <b>Wann wurde Ihre Corona-Anlaufstelle in Betrieb genommen?</b><br><i>(um Ihre Anonymität zu wahren bitten wir Sie nur den Monat der Eröffnung einzutragen)</i>                                                                       |                                                                                                                                                                                                                                                                                               |

**Welche berufliche Qualifikation haben Sie?**

(Mehrfachnennung möglich)

- ☐ Ärztin/ Arzt ohne Gebietsbezeichnung  
☐ Fachärztin/-arzt für Allgemeinmedizin  
☐ *mit aktuell hausärztlicher Tätigkeit*  
☐ *ohne aktuell hausärztliche Tätigkeit*  
☐ Fachärztin/-arzt für Innere Medizin  
☐ *mit aktuell hausärztlicher Tätigkeit*  
☐ *ohne aktuell hausärztliche Tätigkeit*  
☐ Fachärztin/ Facharzt für: \_\_\_\_\_  
☐ Andere: \_\_\_\_\_

**Part 2: Fear for a potential infection with SARS-CoV-2 or financial loss due to practice closure**

| Einstellung/ Haltung                                                                                                                                                |                                                                                                                                                                                                                                                                                                                      |
|---------------------------------------------------------------------------------------------------------------------------------------------------------------------|----------------------------------------------------------------------------------------------------------------------------------------------------------------------------------------------------------------------------------------------------------------------------------------------------------------------|
| Ich habe Angst, mich bei meiner Tätigkeit mit SARS-CoV-2 anzustecken, weil ich <u>selbst erkranken</u> könnte.                                                      | <input type="checkbox"/> Trifft ganz zu<br><input type="checkbox"/> Trifft weitgehend zu<br><input type="checkbox"/> Trifft teils zu, teils nicht<br><input type="checkbox"/> Trifft weitgehend nicht zu<br><input type="checkbox"/> Trifft überhaupt nicht zu<br><input type="checkbox"/> Kann ich nicht beurteilen |
| Ich gehöre einer Risikogruppe für einen schweren Verlauf bei Infektion oder Erkrankung durch SARS-CoV-2 an                                                          | <input type="checkbox"/> Ja<br><input type="checkbox"/> Nein                                                                                                                                                                                                                                                         |
| Ich habe Angst, mich bei meiner Tätigkeit mit SARS-CoV-2 anzustecken, weil ich andere im <u>privaten</u> Umfeld anstecken könnte.                                   | <input type="checkbox"/> Trifft ganz zu<br><input type="checkbox"/> Trifft weitgehend zu<br><input type="checkbox"/> Trifft teils zu, teils nicht<br><input type="checkbox"/> Trifft weitgehend nicht zu<br><input type="checkbox"/> Trifft überhaupt nicht zu<br><input type="checkbox"/> Kann ich nicht beurteilen |
| Ich habe Angst, mich bei meiner Tätigkeit mit SARS-CoV-2 anzustecken, weil ich andere im <u>beruflichen</u> Umfeld (Patient*innen, Mitarbeitende) anstecken könnte. | <input type="checkbox"/> Trifft ganz zu<br><input type="checkbox"/> Trifft weitgehend zu<br><input type="checkbox"/> Trifft teils zu, teils nicht<br><input type="checkbox"/> Trifft weitgehend nicht zu<br><input type="checkbox"/> Trifft überhaupt nicht zu<br><input type="checkbox"/> Kann ich nicht beurteilen |
| Ich fürchte finanzielle Einbußen durch vorübergehende Schließung meiner Praxis im Falle einer Infektion durch SARS-CoV-2.                                           | <input type="checkbox"/> Ja<br><input type="checkbox"/> Nein                                                                                                                                                                                                                                                         |

### Part 3: Knowledge and sources of knowledge related to the SARS-CoV-2 pandemic

| Wissensquellen/ Wissensstand                                                                                                              |                                                                                                                                                                                                                                                                                                                                                                                                                                                                                                                                                                                                                                                                                                                                                                                                                                                        |
|-------------------------------------------------------------------------------------------------------------------------------------------|--------------------------------------------------------------------------------------------------------------------------------------------------------------------------------------------------------------------------------------------------------------------------------------------------------------------------------------------------------------------------------------------------------------------------------------------------------------------------------------------------------------------------------------------------------------------------------------------------------------------------------------------------------------------------------------------------------------------------------------------------------------------------------------------------------------------------------------------------------|
| Bezüglich SARS-CoV-2 bin ich derzeit auf dem aktuellen <u>Wissensstand</u> .                                                              | <input type="checkbox"/> Trifft ganz zu<br><input type="checkbox"/> Trifft weitgehend zu<br><input type="checkbox"/> Trifft teils zu, teils nicht<br><input type="checkbox"/> Trifft weitgehend nicht zu<br><input type="checkbox"/> Trifft überhaupt nicht zu<br><input type="checkbox"/> Kann ich nicht beurteilen                                                                                                                                                                                                                                                                                                                                                                                                                                                                                                                                   |
| Den Aufwand, eigene Wissenslücken bzgl. SARS-CoV-2 zu schließen, habe ich <u>zu Beginn der SARS-CoV-2-Pandemie</u> als hoch eingeschätzt. | <input type="checkbox"/> Trifft ganz zu<br><input type="checkbox"/> Trifft weitgehend zu<br><input type="checkbox"/> Trifft teils zu, teils nicht<br><input type="checkbox"/> Trifft weitgehend nicht zu<br><input type="checkbox"/> Trifft überhaupt nicht zu<br><input type="checkbox"/> Kann ich nicht beurteilen                                                                                                                                                                                                                                                                                                                                                                                                                                                                                                                                   |
| Den Aufwand, eigene Wissenslücken bzgl. SARS-CoV-2 zu schließen, schätze ich <u>derzeit</u> als hoch ein.                                 | <input type="checkbox"/> Trifft ganz zu<br><input type="checkbox"/> Trifft weitgehend zu<br><input type="checkbox"/> Trifft teils zu, teils nicht<br><input type="checkbox"/> Trifft weitgehend nicht zu<br><input type="checkbox"/> Trifft überhaupt nicht zu<br><input type="checkbox"/> Kann ich nicht beurteilen                                                                                                                                                                                                                                                                                                                                                                                                                                                                                                                                   |
| <u>Informationen</u> , die ich hierfür nutze, sind:                                                                                       | <input type="checkbox"/> Kassenärztliche Vereinigung<br><input type="checkbox"/> Robert-Koch-Institut (RKI)<br><input type="checkbox"/> Gesundheitsamt<br><input type="checkbox"/> Deutsche Gesellschaft für Allgemeinmedizin (DEGAM)<br><input type="checkbox"/> Hausärzteverband (HÄV)<br><input type="checkbox"/> Kolleg*innen<br><input type="checkbox"/> Ärztekammer<br><input type="checkbox"/> Deutsches Ärzteblatt<br><input type="checkbox"/> Deximed<br><input type="checkbox"/> Podcasts <ul style="list-style-type: none"> <li><input type="checkbox"/> NDR Prof. Drosten</li> <li><input type="checkbox"/> MDR Prof. Kekulé</li> <li><input type="checkbox"/> Ärztezeitung Prof. Scherer</li> <li><input type="checkbox"/> Sonstige</li> </ul> <input type="checkbox"/> Medizinische Journals<br><input type="checkbox"/> Sonstige: _____ |

## Part 4: Self-efficacy regarding anamnestic and diagnostic procedures related to SARS-CoV-2

| Anamnese und Diagnostik                                                                                                                                                                                                                                |                                                                                                                                                                                                                                                                                                                      |
|--------------------------------------------------------------------------------------------------------------------------------------------------------------------------------------------------------------------------------------------------------|----------------------------------------------------------------------------------------------------------------------------------------------------------------------------------------------------------------------------------------------------------------------------------------------------------------------|
| <b><u>Zu Beginn meiner Tätigkeit in der Corona-Anlaufstelle</u> habe ich mich in der Anamnese und Diagnostik bei PAT_COV sicher gefühlt.</b>                                                                                                           | <input type="checkbox"/> Trifft ganz zu<br><input type="checkbox"/> Trifft weitgehend zu<br><input type="checkbox"/> Trifft teils zu, teils nicht<br><input type="checkbox"/> Trifft weitgehend nicht zu<br><input type="checkbox"/> Trifft überhaupt nicht zu<br><input type="checkbox"/> Kann ich nicht beurteilen |
| <b><u>Nach 4 Wochen meiner Tätigkeit in der Corona-Anlaufstelle</u> habe ich mich in der Anamnese und Diagnostik bei PAT_COV sicher gefühlt.</b>                                                                                                       | <input type="checkbox"/> Trifft ganz zu<br><input type="checkbox"/> Trifft weitgehend zu<br><input type="checkbox"/> Trifft teils zu, teils nicht<br><input type="checkbox"/> Trifft weitgehend nicht zu<br><input type="checkbox"/> Trifft überhaupt nicht zu<br><input type="checkbox"/> Kann ich nicht beurteilen |
| <b><u>Derzeit</u> fühle ich in der Anamnese und Diagnostik bei PAT_COV sicher.</b>                                                                                                                                                                     | <input type="checkbox"/> Trifft ganz zu<br><input type="checkbox"/> Trifft weitgehend zu<br><input type="checkbox"/> Trifft teils zu, teils nicht<br><input type="checkbox"/> Trifft weitgehend nicht zu<br><input type="checkbox"/> Trifft überhaupt nicht zu<br><input type="checkbox"/> Kann ich nicht beurteilen |
| <b><u>Zu Beginn meiner Tätigkeit in der Corona-Anlaufstelle</u> fühlte ich mich in der Entscheidung des Procedere bei PAT_COV sicher.</b><br><br><i>Procedere: Therapie, ambulante oder stationäre Weiterbehandlung, nächste Wiedervorstellung</i>     | <input type="checkbox"/> Trifft ganz zu<br><input type="checkbox"/> Trifft weitgehend zu<br><input type="checkbox"/> Trifft teils zu, teils nicht<br><input type="checkbox"/> Trifft weitgehend nicht zu<br><input type="checkbox"/> Trifft überhaupt nicht zu<br><input type="checkbox"/> Kann ich nicht beurteilen |
| <b><u>Nach 4 Wochen meiner Tätigkeit in der Corona-Anlaufstelle</u> fühlte ich mich in der Entscheidung des Procedere bei PAT_COV sicher.</b><br><br><i>Procedere: Therapie, ambulante oder stationäre Weiterbehandlung, nächste Wiedervorstellung</i> | <input type="checkbox"/> Trifft ganz zu<br><input type="checkbox"/> Trifft weitgehend zu<br><input type="checkbox"/> Trifft teils zu, teils nicht<br><input type="checkbox"/> Trifft weitgehend nicht zu<br><input type="checkbox"/> Trifft überhaupt nicht zu<br><input type="checkbox"/> Kann ich nicht beurteilen |
| <b><u>Derzeit</u> fühle ich mich in der Entscheidung des Procedere bei PAT_COV sicher.</b><br><br><i>Procedere: Therapie, ambulante oder stationäre Weiterbehandlung, nächste Wiedervorstellung</i>                                                    | <input type="checkbox"/> Trifft ganz zu<br><input type="checkbox"/> Trifft weitgehend zu<br><input type="checkbox"/> Trifft teils zu, teils nicht<br><input type="checkbox"/> Trifft weitgehend nicht zu<br><input type="checkbox"/> Trifft überhaupt nicht zu<br><input type="checkbox"/> Kann ich nicht beurteilen |

## Part 5: Prevention measures to contain the spread of SARS-CoV-2

| Maßnahmen zur Eindämmung der SARS-CoV-2 Pandemie                                                               |                                                                                                                                                                                                                                                                                                                              |
|----------------------------------------------------------------------------------------------------------------|------------------------------------------------------------------------------------------------------------------------------------------------------------------------------------------------------------------------------------------------------------------------------------------------------------------------------|
| <b>Die Umsetzung der Hygienevorschriften bei Kontakt mit PAT_COV ist in unserer Einrichtung gut umsetzbar.</b> | <input type="checkbox"/> Trifft ganz zu<br><input type="checkbox"/> Trifft weitgehend zu<br><input type="checkbox"/> Trifft teils zu, teils nicht<br><input type="checkbox"/> Trifft weitgehend nicht zu<br><input type="checkbox"/> Trifft überhaupt nicht zu<br><input type="checkbox"/> Kann ich nicht beurteilen         |
| <b>Die Distanzierung von PAT_COV gelingt in unserer Corona-Anlaufstelle <u>räumlich</u>.</b>                   | <input type="checkbox"/> Trifft zu<br><input type="checkbox"/> Trifft eher zu<br><input type="checkbox"/> Teils-Teils<br><input type="checkbox"/> Trifft eher nicht zu<br><input type="checkbox"/> Trifft nicht zu<br><input type="checkbox"/> Kann ich nicht beurteilen                                                     |
| <b>Wie führen Sie die räumliche Trennung genau durch?</b><br><i>(Mehrfachnennung möglich)</i>                  | <input type="checkbox"/> Unterschiedliche Wartezimmer<br><input type="checkbox"/> Wartezeit im eigenen Auto<br><input type="checkbox"/> Wartezeit vor der Einrichtung<br><input type="checkbox"/> Unterschiedliche Behandlungsräume<br><input type="checkbox"/> Wegemarkierungen<br><input type="checkbox"/> Sonstige: _____ |
| <b>Die Distanzierung von PAT_COV gelingt in unserer Corona-Anlaufstelle <u>zeitlich</u>.</b>                   | <input type="checkbox"/> Trifft zu<br><input type="checkbox"/> Trifft eher zu<br><input type="checkbox"/> Teils-Teils<br><input type="checkbox"/> Trifft eher nicht zu<br><input type="checkbox"/> Trifft nicht zu<br><input type="checkbox"/> Kann ich nicht beurteilen                                                     |
| <b>Wie führen Sie die zeitliche Trennung genau durch?</b><br><i>(Mehrfachnennung möglich)</i>                  | <input type="checkbox"/> Terminvergabe<br><input type="checkbox"/> Sonstige: _____<br>Anmerkungen:                                                                                                                                                                                                                           |

**Part 6: Treatment capacity per SARS-CoV-2 contact point and primary care practices during the first wave of the SARS-CoV-2 pandemic in Baden-Wuerttemberg, Germany**

| Patientenkontakte/Kapazität                                                                                                                                                                                  |                                                                                                   |
|--------------------------------------------------------------------------------------------------------------------------------------------------------------------------------------------------------------|---------------------------------------------------------------------------------------------------|
| <b>Wie viele Patient*innen mit Verdacht auf oder gesicherter COVID-19-Erkrankung (PAT_COV) haben Sie seit Eröffnung behandelt?</b><br><i>(es zählt auch eine alleinige Abstrich-Entnahme als Behandlung)</i> |                                                                                                   |
| Durchschnittlich Tag                                                                                                                                                                                         |                                                                                                   |
| Gesamt seit Beginn der SARS-Cov-2-Pandemie 2020 im März 2020                                                                                                                                                 |                                                                                                   |
| <b>Wie viele PAT_COV <u>könnten Sie</u> pro Tag in Ihrer Corona-Anlaufstelle maximal behandeln?</b><br><i>(bitte tragen Sie die jeweilige Anzahl auf den Linien ein)</i>                                     | _____ sofort<br>_____, wenn ich personell aufstocke<br>_____, wenn ich weitere Maßnahmen ergreife |
